# Supplementary material for: Gastrointestinal Nematode-Derived Antigens Alter Colorectal Cancer Cell Proliferation and Migration through Regulation of Cell Cycle and Epithelial-Mesenchymal Transition Proteins
Source: MDPI journal article supplement (doi:10.3390/ijms21217845), 2020-10-22
Supplement: s1 [file s1]

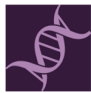

Supplementary Materials

## Gastrointestinal Nematode-Derived Antigens Alter Colorectal Cancer Cell Proliferation and Migration through Regulation of Cell Cycle and Epithelial-Mesenchymal Transition Proteins

Brittany-Amber Jacobs <sup>1</sup>, Sharon Prince <sup>2</sup> and Katherine Ann Smith <sup>1,3,\*</sup>

<sup>1</sup> Institute of Infectious Disease and Molecular Medicine, University of Cape Town, Cape Town 7925, South Africa; brittany-amber.jacobs@ludwig.ox.ac.uk

<sup>2</sup> Department of Human Biology, University of Cape Town, Cape Town 7925, South Africa; sharon.prince@uct.ac.za

<sup>3</sup> School of Medicine, Cardiff University, Cardiff CF14 3XN, UK; smithk28@cardiff.ac.uk

\* Correspondence: smithk28@cardiff.ac.uk; Tel.: +44-2920-874-303

Received: 03 September 2020; Accepted: 19 October 2020; Published: date

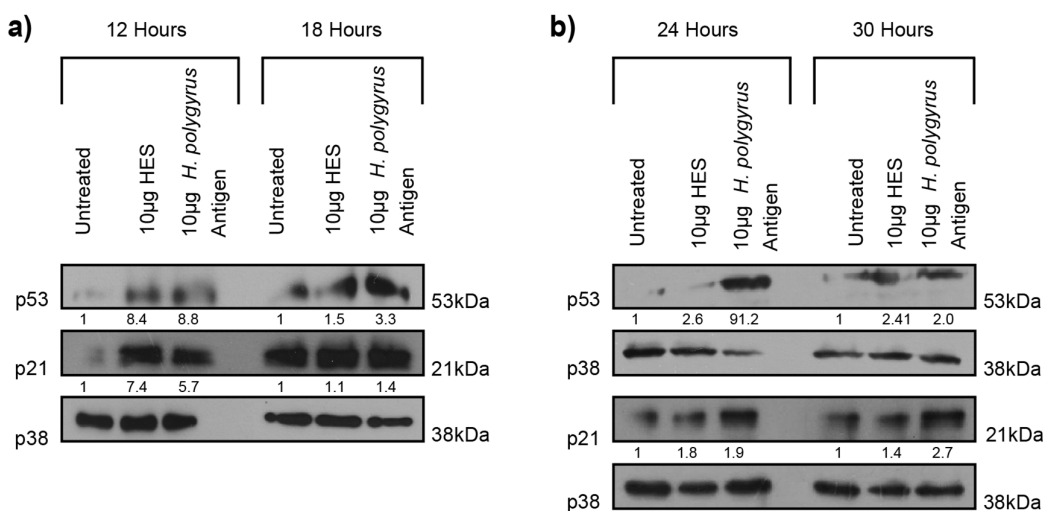

**Supplementary Figure 1:** *H. polygyrus*-derived antigens increase the expression of colorectal cancer (CRC) cell-cycle arrest proteins p53 and p21. Western blot analyses of p53, p21 and p38 (loading control) were performed following exposure of (a) CT26.WT cells for 12- and 18-hours and (b) HCT116 cells for 24- and 30-hours to 10  $\mu$ g *H. polygyrus* antigen and 10  $\mu$ g HES. Densitometry readings were obtained using ImageJ in order to determine the changes in protein expression of p53 and p21 normalised to p38 and expressed as a fold-change relative to control wells. This figure represents the second independent repeat of figure 3.
